# Supplementary material
Source: PubMed Central journal article supplement (PMC7357548)
Supplement: NIHMS1593633-supplement-1.pdf [file NIHMS1593633-supplement-1.pdf]

Table S1. Antibodies used for RPPA and /or Western blot

| Antibody                        | Source                         |
|---------------------------------|--------------------------------|
| 4EBP1 pS65                      | Cell Signaling <sup>1</sup>    |
| 4EBP1 pT37/T46                  | Cell Signaling <sup>1</sup>    |
| 53BP1                           | Cell Signaling <sup>1</sup>    |
| AKT pS473                       | Cell Signaling <sup>1</sup>    |
| $\beta$ -Actin                  | Sigma <sup>2</sup>             |
| Bad pS112                       | Cell Signaling <sup>1</sup>    |
| Bcl2A1                          | Abnova <sup>3</sup>            |
| c-Raf pS338                     | Cell Signaling <sup>1</sup>    |
| DUSP4                           | Cell Signaling <sup>1</sup>    |
| eEF 2K                          | Cell Signaling <sup>1</sup>    |
| MET pY1234/1235                 | Cell Signaling <sup>1</sup>    |
| MET                             | Cell Signaling <sup>1</sup>    |
| Flag M2                         | Sigma <sup>2</sup>             |
| GSK-3 $\alpha$ / $\beta$ pS21/9 | Cell Signaling <sup>1</sup>    |
| HER3                            | Santa Cruz <sup>4</sup>        |
| HSP27                           | Cell Signaling <sup>1</sup>    |
| IGF1R pY1135                    | Cell Signaling <sup>1</sup>    |
| MAPK pT202/Y204                 | Cell Signaling <sup>1</sup>    |
| MDM2 pS166                      | Cell Signaling <sup>1</sup>    |
| MEK1 pS217/S221                 | Cell Signaling <sup>1</sup>    |
| NDRG1 pT346                     | Cell Signaling <sup>1</sup>    |
| NF $\kappa$ B P65 pS536         | Cell Signaling <sup>1</sup>    |
| P21                             | Santa Cruz <sup>4</sup>        |
| P38 pT180/Y182                  | Cell Signaling <sup>1</sup>    |
| P70S6 pT389                     | Cell Signaling <sup>1</sup>    |
| PDK1 pS241                      | Epitomics <sup>4</sup>         |
| PKC $\beta$ II pS660            | Cell Signaling <sup>1</sup>    |
| PI3K p110 $\alpha$              | Cell Signaling <sup>1</sup>    |
| PRAS40 pT246                    | Life Technologies <sup>5</sup> |
| Rictor pT1135                   | Cell Signaling <sup>1</sup>    |
| S6 pS235/S436                   | Cell Signaling <sup>1</sup>    |
| Shc pY317                       | Cell Signaling <sup>1</sup>    |
| Smad4                           | Cell Signaling <sup>1</sup>    |
| STAT3 pY705                     | Cell Signaling <sup>1</sup>    |
| TAZ                             | Cell Signaling <sup>1</sup>    |
| Tuberin pT1462                  | Cell Signaling <sup>1</sup>    |
| V5                              | Invitrogen <sup>6</sup>        |
| XPA                             | Santa Cruz <sup>4</sup>        |
| YB1 pS102                       | Cell Signaling <sup>1</sup>    |

<sup>1</sup>Beverly, MA; <sup>2</sup> St Louis, MO; <sup>3</sup> Walnut, CA; <sup>4</sup>Santa Cruz, CA; <sup>5</sup>Life Technologies; Epitomics, Burlingame, CA; <sup>6</sup>Invitrogen, Carlsbad, CA

Figure S1

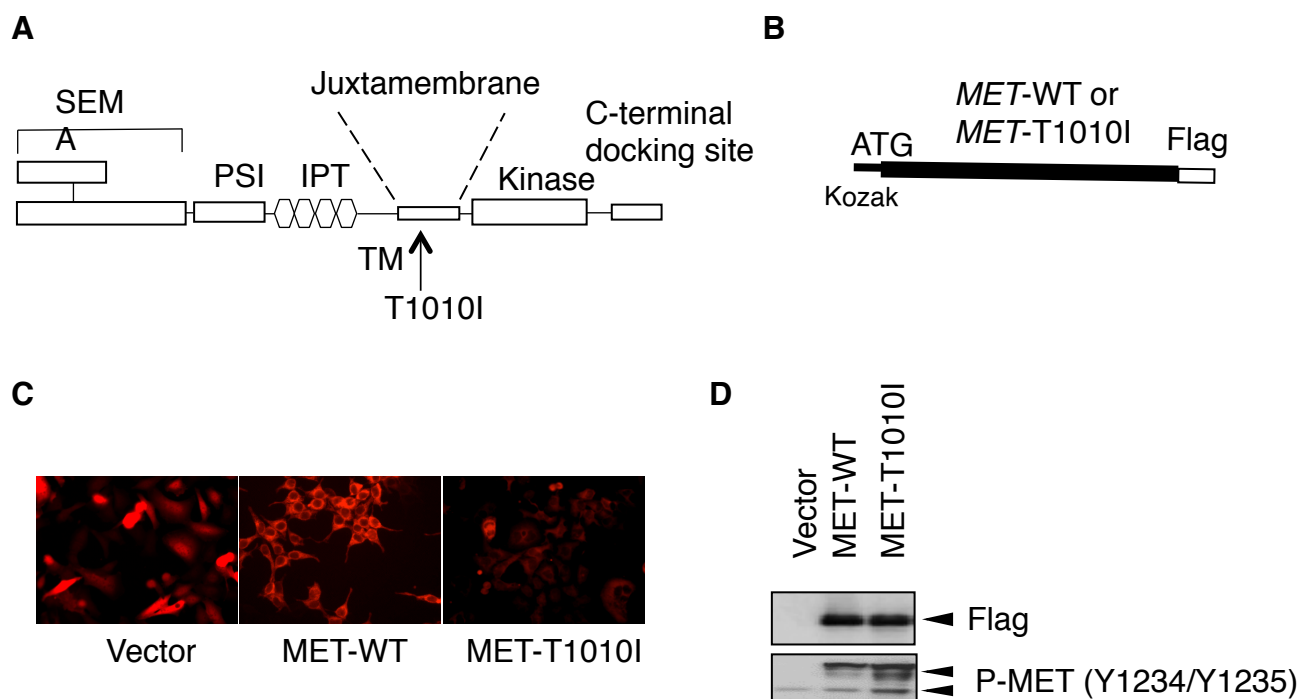

**Figure S1. Development of lentiviral constructs for expression of human wild type *MET* and *MET-T1010I* genes**

**A.** Location of breast cancer-associated T1010I in human *MET* molecule. **B.** Human WT *MET* and *MET-T1010I* gene cassetts. The genes were synthesized by GeneART following our design. The fragments of Kozak-*MET*s-Flag were excised from pMA vector 2 with XhoI/XmaI and inserted into pLVX-tdTomatoN1, a lentiviral vector (Clontech, Mountain View, CA). **C.** Expression of exogenous *MET* fusion protein. HCC1954 cells with endogenous *PIK3CA-H1047R* were transformed with the *MET* genes. *MET*-Flag-Td Tomato fusion protein was detected with Td Tomato fluorescence. **D.** Western blot analysis for phosphorylation of *MET* after stimulation with HGF (40 ng/ml for 30 minutes). The upper band shows exogenous and the lower band is endogenous.

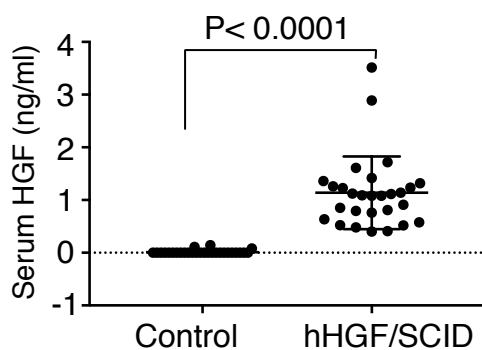

**Figure S2. Serum human HGF concentration in hHGF Tg/SCID mice.**

Serum HGF concentration of the hHGF Tg/SCID mice was measured using the Human HGF Quantikine ELISA Kit (R&D Systems, MN). The serum samples from the negative littermates were used as control.

Figure S3

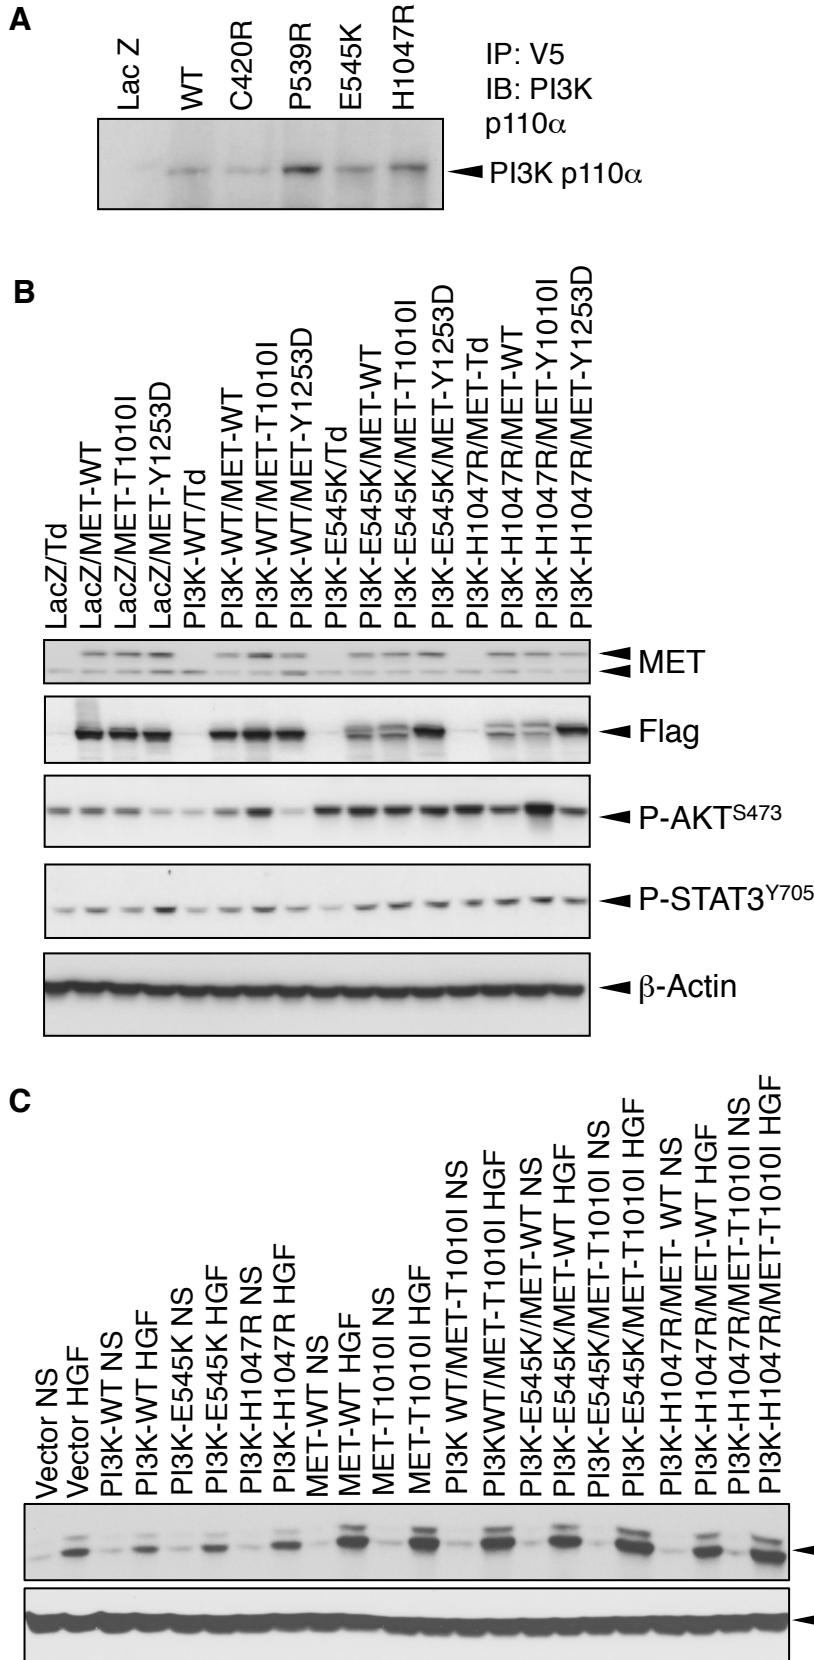

**Figure S3. Establishment of stable cells expressing breast cancer-associated mutant *PIK3CA* or *PIK3CA/MET* genes in mammary epithelial cell MCF-10A cells.**

**A.** Expression of PIK3CA-V5. V5 antibody was used for IP and anti-PI3K P110 $\alpha$  antibody was used for immunoblot (IB). **B.** Effect of expression of *PIK3CA* and/or *MET* genes on PI3K-AKT pathway (Western blot). The cells indicated were cultured in growth medium, without starvation and stimulation. Exogenous MET-Flag-Tdtomato fusion protein (upper band) and endogenous MET ( lower band) were detected with cMET antibody. **C.** Effect of expression of *PIK3CA* and/or *MET* genes on MAPK pathway (Western blot). The cells indicated received starvation for over night, followed by stimulation with HGF (40 ng/ml) for 10 minutes (HGF), while the cells were treated with the vehicle (0.1% BSA in PBS) only as control (NS). Phosphorylation of MAPK was detected with Western blot.

*MET*-Y1253D, a mutation in kinase domain, was used as positive control.

Figure S4

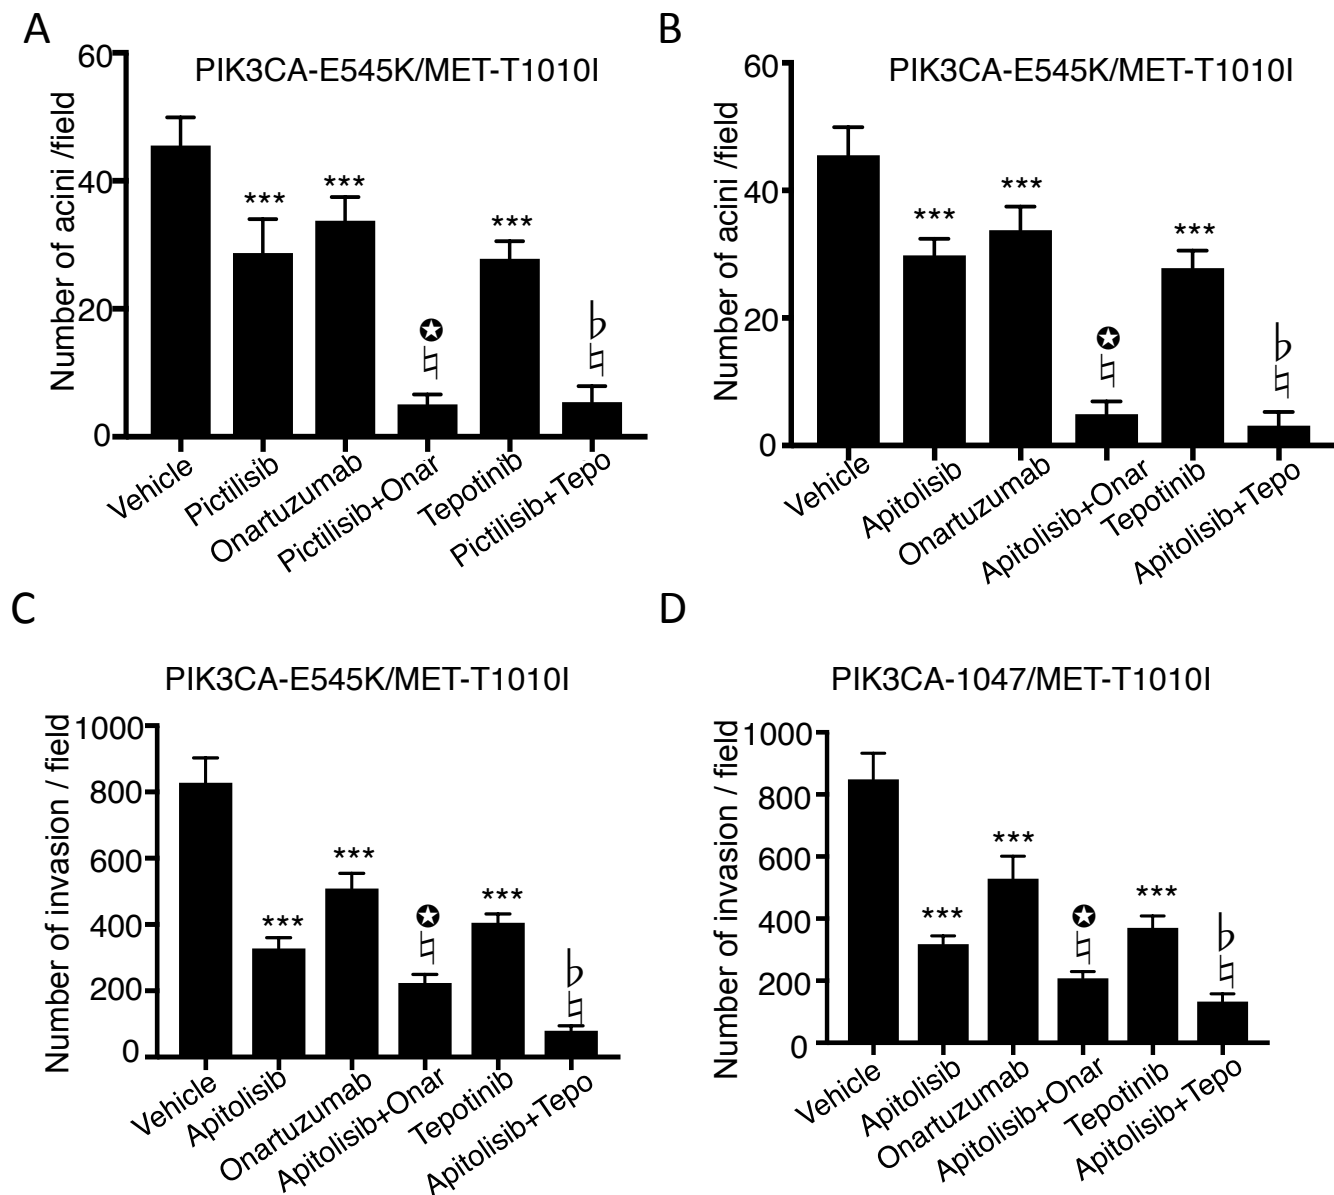

**Figure S4. Effects of combined targeting PI3K and MET on acini formation or cell invasion MCF-10A derived cells.** A total of  $4 \times 10^3$  MCF-10A derived cells with expression of *MET-T1010I/PIK3CA-E545K* genes were resuspended in modified growth medium (2.5 % horse serum, 5 ng/mL EGF), supplemented HGF 40 ng/ml and 2% growth factor decreased matrigel, and treated with onnartuzumab (Onar) or Tepotinib (Tepo) alone or combined with Pictilisib (A) or apitolisib (B). The acini were accounted (detail in Supplementary Methods ). The MCF-10A-derived cells with expression of *PIK3CA-E545K/MET-T1010I* (C) or *PIK3CA-1047/MET-T1010I* (D) were starved for 20 hours in serum-free DMEM F12 lacking EGF, insulin, and hydrocortisone. A total of  $1 \times 10^5$  cells were inoculated into the upper chamber. apitolisib, onartuzumab (Onar) or Tepotinib (Tepo) alone or different combinations as indicated were added into both the upper and lower chambers. HGF and fibronectin were added in the lower chamber as the inducer. Invasive cells were photographed (not shown) and counted in 10 random fields. The data are mean  $\pm$  standard deviation of triplicates, representative of two independent experiments (\*,  $P < 0.01$ ; \*\*,  $P < 0.001$ ; \*\*\*,  $P < 0.0001$  versus vehicle; †,  $P < 0.0001$  versus Pictilisib; †\*,  $P < 0.0001$  versus Onartuzumab; †,  $P < 0.0001$  versus Tepotinib, ANOVA).

A

Relative protein level (Log2)

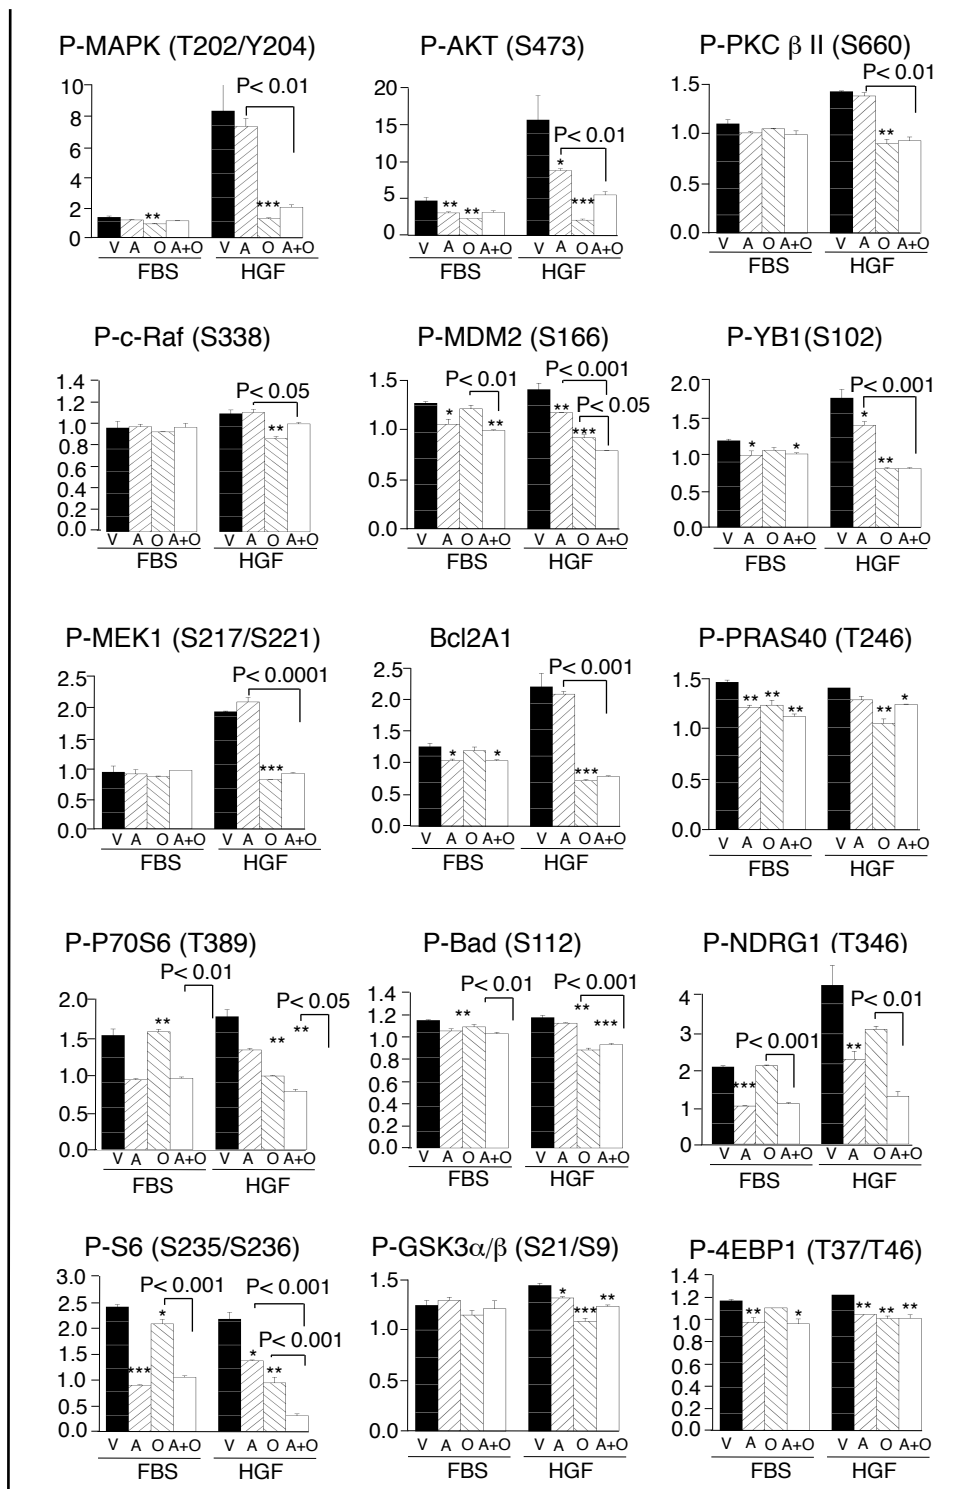

B

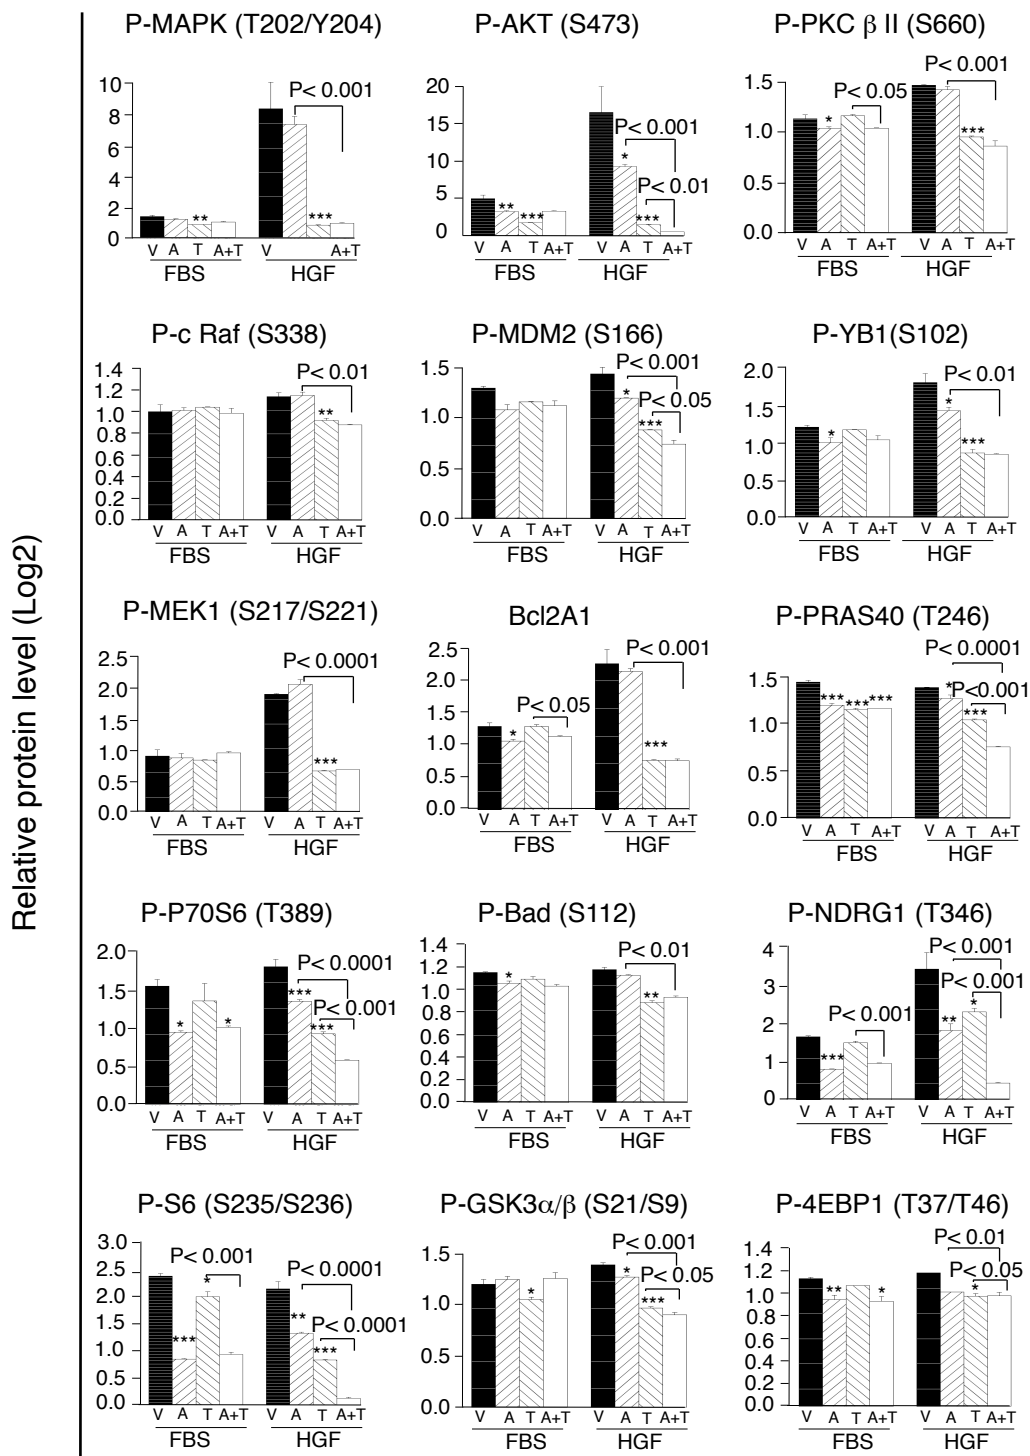

Figure S5. Effect of HGF on cellular signaling response to targeted therapies in oncogenic **MET-T1010I** and **PIK3CA-H1047R** gene transformed cells. **A.** MCF-10A derived cells with expression of *MET-T1010I* /*PIK3CA-H1047R* genes received starvation for overnight, followed by treatment with apitolisib (A), onartuzumab (O) alone or their combination (A+O), and stimulation with HGF or FBS. **B.** Using Tepotinib (T) instead of Onatuzumab. The RPPA data were analyzed (as described in Materials and Methods (mean  $\pm$  SD; the *P*-value based on the log2 data).

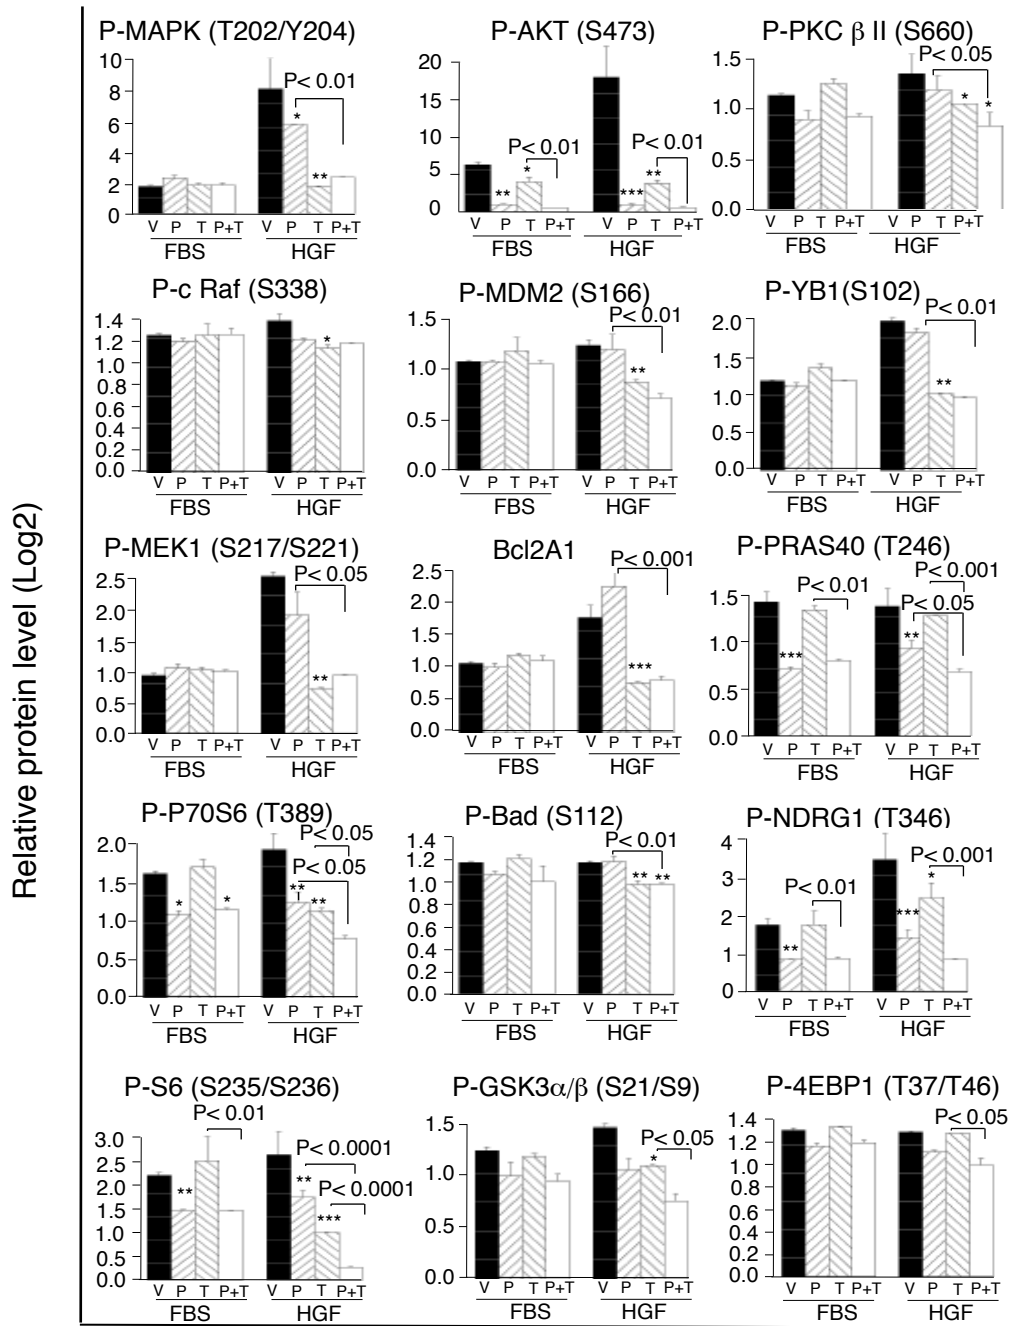

Figure S6. Effect of HGF on cellular signaling response to targeted therapies in oncogenic MET-Y1253D and PIK3CA-H1047R gene transformed cells. MCF-10A derived cells with expression of MET-Y1253D/PIK3CA-H1047R genes received starvation for overnight, followed by treatment with pictilisib (P) or tepotinib (T) alone or their combination (P+T), and stimulation with HGF or FBS.
